# Supplementary material for: Positional isomerism in triarylmethyl carbocation radical salts: positional isomeric effects, crystal structures and properties
Source: Royal Society of Chemistry journal article supplement (doi:10.1039/c5ce00172b), 2015-01-01
Supplement: c5ce00172b1.pdf [file c5ce00172b1.pdf]

## Electronic Supplementary Information

### Positional isomerism in triarylmethyl carbocation radical salts: position isomeric effects, crystal structures and properties

Guo-Ping Yong,\* Chen Shen, Ya Feng, Xue-Rui Zhang and Yu-Mei Zhao

Department of Chemistry, University of Science and Technology of China, Hefei  
230026, P. R. China

E-mail: gpyong@ustc.edu.cn

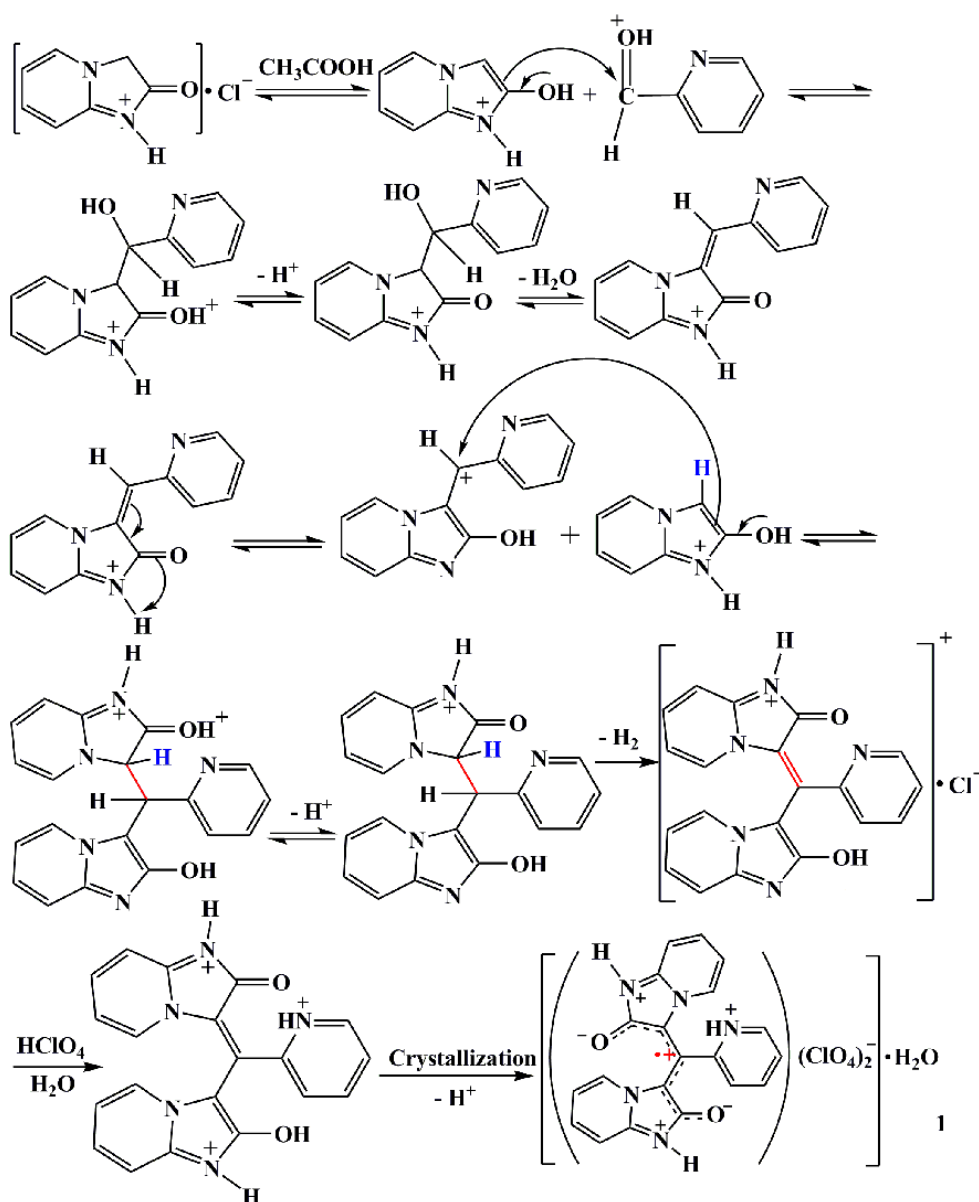

Scheme S1 Proposed reaction mechanism.

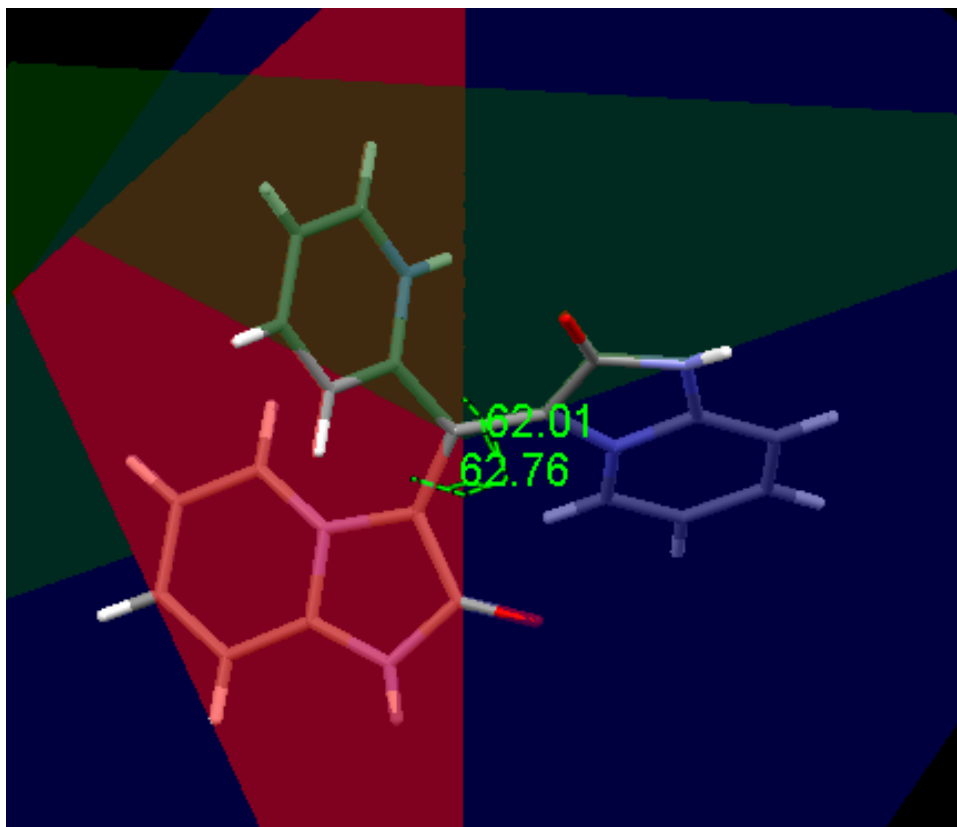

**Fig. S1** Dihedral angles among two imidazo[1,2-*a*]pyridine rings and one pyridine ring for **1**.

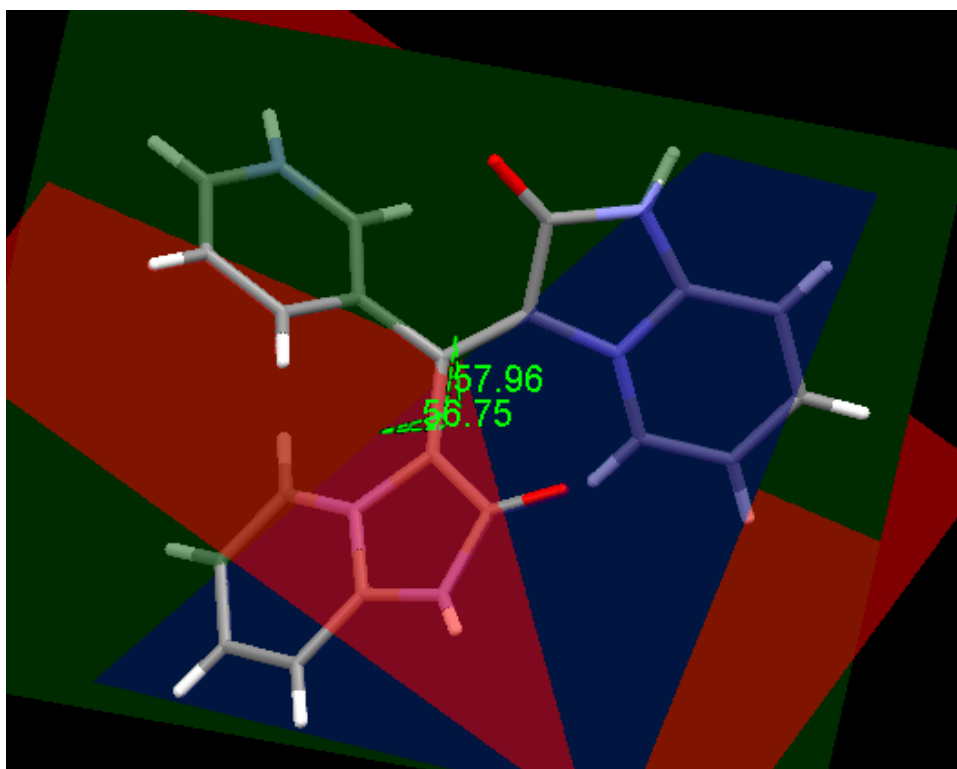

**Fig. S2** Dihedral angles among two imidazo[1,2-*a*]pyridine rings and one pyridine ring for **2**.

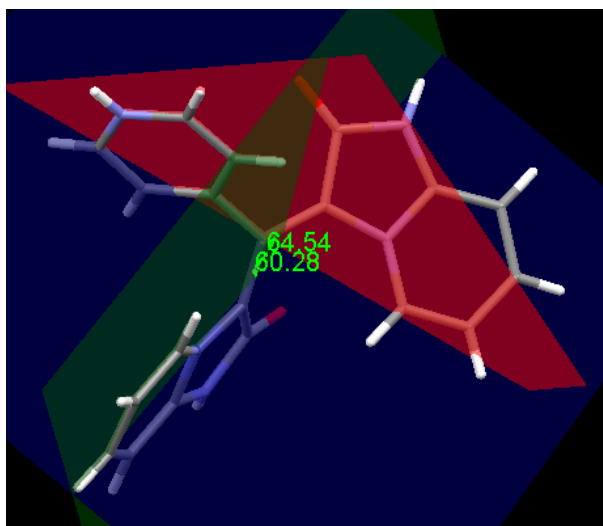

**Fig. S3** Dihedral angles among two imidazo[1,2-*a*]pyridine rings and one pyridine ring for **3**.

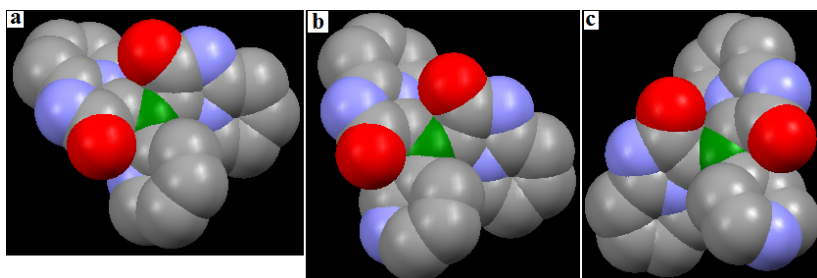

**Fig. S4** The space-filling representation for **1** (a), **2** (b) and **3** (c): showing the high steric shielding of the central carbon atom (green).

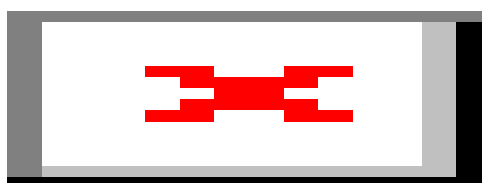

**Fig. S5** ORTEP diagrams with ellipsoids drawn at 50% probability for triarylmethyl carbocation radical moiety in **1** (a, selected bond lengths: C8–C7 of 1.395(5) Å, C8–C9 of 1.386(5) Å, and C8–C16 of 1.487(5) Å; selected bond angles: C7–C8–C9 of 123.5(3)°, C7–C8–C16 of 119.9(3)°, and C9–C8–C16 of 115.9(3)°), **2** (b, selected bond lengths: C8–C7 of 1.395(4) Å, C8–C9 of 1.387(5) Å, and C8–C16 of 1.487(4) Å; selected bond angles: C7–C8–C9 of 122.7(3)°, C7–C8–C16 of 119.8(3)°, and C9–C8–C16 of 117.2(3)°) and **3** (c, selected bond lengths: C8–C7 of 1.417(4) Å, C8–C9 of 1.372(5) Å, and C8–C16 of 1.494(4) Å; selected bond angles: C7–C8–C9 of 124.0(3)°, C7–C8–C16 of 118.8(3)°, and C9–C8–C16 of 116.8(3)°).

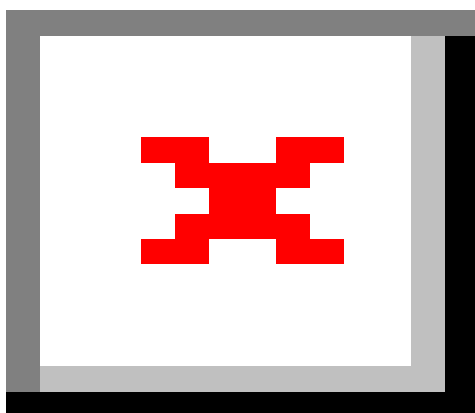

**Fig. S6** The PXRD patterns of **1**.

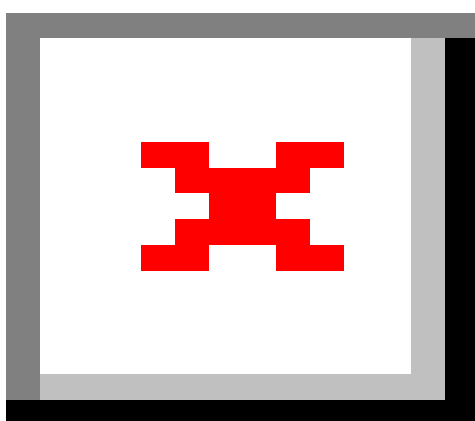

**Fig. S7** The PXRD patterns of **2**.

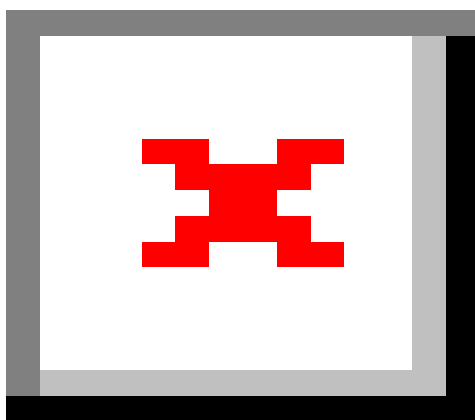

Fig. S8 The PXRD patterns of **3**.

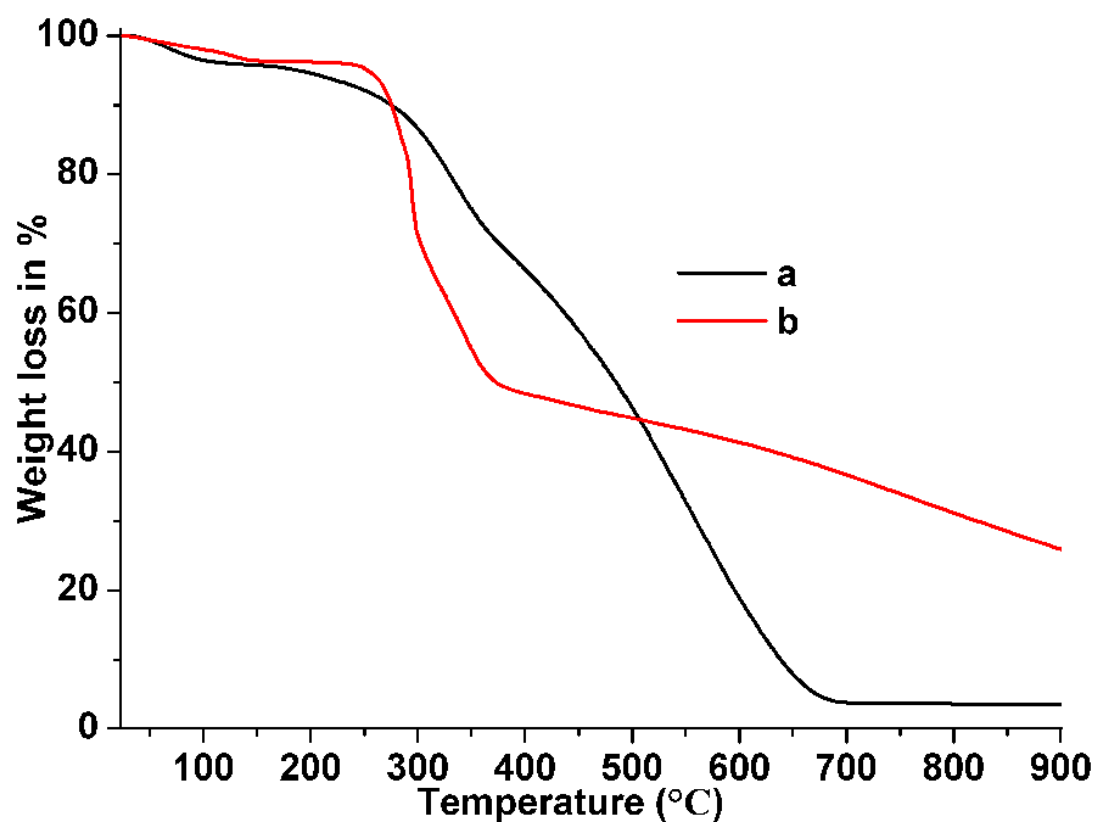

Fig. S9 TGA curves for triarylmethyl carbocation radical salts **1** (a) and **2** (b).
